# Supplementary material
Source: publisher site journal article supplement (https://www.e-cmh.org/upload/media/cmh-2020-0023-suppl4.pdf)
Supplement: Supplementary file 1 [file cmh-2020-0023-suppl4.pdf]

**Supplementary Table 4.** Estimated mean change in log value of HCV RNA after treatment in patients who did not achieve end-treatment response and sustained virologic response

| Time point | Estimated mean (log IU/mL) | SE    | 95% CI      | <i>P</i> compared with baseline | <i>P</i> compared with 4 weeks | <i>P</i> compared with EOT |
|------------|----------------------------|-------|-------------|---------------------------------|--------------------------------|----------------------------|
| Baseline   | 5.973                      | 0.276 | 5.395–6.551 |                                 |                                |                            |
| 4 weeks    | 3.726                      | 0.145 | 3.422–4.029 | <0.001                          |                                |                            |
| EOT        | 3.390                      | 0.075 | 3.232–3.547 | <0.001                          | 0.115                          |                            |
| 24 weeks   | 4.788                      | 0.140 | 4.495–5.082 | 0.028                           | <0.001                         | <0.001                     |

HCV, hepatitis C virus; SE, standard error; CI, confidence interval; EOT, end of treatment.
